# Supplementary material for: Seed Germination Behavior, Growth, Physiology and Antioxidant Metabolism of Four Contrasting Cultivars under Combined Drought and Salinity in Soybean
Source: MDPI journal article supplement (doi:10.3390/antiox11030498), 2022-03-03
Supplement: s1 [file s1]

**Table S1.** Different drought and salt treatments which used for imposing stress for 7days.

| S.No | Treatments      | PEG/Salt concentration     |
|------|-----------------|----------------------------|
| 1    | CK              | Control condition          |
| 2    | Drought         | 15% PEG-6000               |
| 3    | Salinity        | 150 mM NaCl                |
| 4    | Combined Stress | 15% PEG-6000 + 150 mM NaCl |

**Table S2.** Seed germination percentage (SGP), rate of germination index (GRI) and Germination energy (GE) of four soybean cultivars grown under drought stress conditions. Data presented are means  $\pm$  SD. Different letters denote significant difference at  $p < 0.05$  based on the least significant difference (LSD) test. Abbreviation; CK=control, D1=PEG6000 5% Drought; D2= PEG6000 10% Drought; D3, PEG6000 15% Drought.

| Cultivars | Variables | Treatments         |                    |                    |                    |                    |                     |
|-----------|-----------|--------------------|--------------------|--------------------|--------------------|--------------------|---------------------|
|           |           | Control VS D 1     |                    | Control VS D2      |                    | Control VS D3      |                     |
|           |           | CK                 | D1                 | CK                 | D2                 | CK                 | D3                  |
| PI567731  | SGP       | 93.33 $\pm$ 3.33 a | 90 $\pm$ 5.35 a    | 93.33 $\pm$ 3.33 a | 96.67 $\pm$ 3.33 a | 93.33 $\pm$ 3.33 a | 83.33 $\pm$ 3.33 a  |
|           | GRI       | 4.04 $\pm$ 0.59 a  | 3.39 $\pm$ 0.16 b  | 4.04 $\pm$ 0.59 a  | 4.26 $\pm$ 0.34 a  | 4.04 $\pm$ 0.59 a  | 3.51 $\pm$ 0.13 a   |
|           | GE        | 86.67 $\pm$ 3.59a  | 76.67 $\pm$ 3.33 a | 86.67 $\pm$ 3.59a  | 83.33 $\pm$ 6.87 a | 86.67 $\pm$ 3.59 a | 57.00 $\pm$ 3.00 b  |
| PI416937  | GP        | 90 $\pm$ 5.77 a    | 80.00 $\pm$ 5.75 a | 90 $\pm$ 5.77 a    | 93.33 $\pm$ 3.33 a | 90 $\pm$ 5.77 a    | 73.33 $\pm$ 6.67 a  |
|           | GRI       | 3.63 $\pm$ 0.13 a  | 3.04 $\pm$ 0.29 a  | 3.63 $\pm$ 0.13 a  | 3.50 $\pm$ 0.43 a  | 3.63 $\pm$ 0.13 a  | 3.31 $\pm$ 0.31 a   |
|           | GE        | 83.33 $\pm$ 5.33 a | 66.67 $\pm$ 4.26 a | 83.33 $\pm$ 5.33 a | 63.33 $\pm$ 3.37 a | 83.33 $\pm$ 5.33 a | 53.67 $\pm$ 0.41 b  |
| PI567690  | GP        | 86.67 $\pm$ 3.33 a | 80.00 $\pm$ 3.33 a | 86.67 $\pm$ 3.33 a | 83.33 $\pm$ 5.75 a | 86.67 $\pm$ 3.33 a | 66.67 $\pm$ 3.33 a  |
|           | GRI       | 3.72 $\pm$ 0.22 a  | 3.07 $\pm$ 0.26 a  | 3.72 $\pm$ 0.22 a  | 4.60 $\pm$ 0.37 a  | 3.72 $\pm$ 0.22 a  | 2.83 $\pm$ 0.41 a   |
|           | GE        | 80.00 $\pm$ 5.77 a | 66.67 $\pm$ 4.42 a | 80.00 $\pm$ 5.77 a | 73.33 $\pm$ 5.77 a | 80.00 $\pm$ 5.77 a | 56.67 $\pm$ 3.43 a  |
| PI408105A | GP        | 86.67 $\pm$ 3.77 a | 66.67 $\pm$ 4.66 a | 86.67 $\pm$ 3.77   | 70 $\pm$ 5.77 b    | 86.67 $\pm$ 3.77a  | 46.667 $\pm$ 3.33 a |
|           | GRI       | 3.67 $\pm$ 0.31 a  | 2.82 $\pm$ 0.32a   | 3.67 $\pm$ 0.31 a  | 1.92 $\pm$ 0.59a   | 3.67 $\pm$ 0.31 a  | 1.71 $\pm$ 0.17 b   |
|           | GE        | 83.33 $\pm$ 6.67 a | 56.67 $\pm$ 8.22a  | 83.33 $\pm$ 6.67 a | 46.67 $\pm$ 3.35 a | 83.33 $\pm$ 6.67 a | 43.33 $\pm$ 3.17 b  |

**Table S3.** Seed germination percentage (SGP), rate of germination index (GRI) and Germination energy (GE) of four soybean cultivars grown under Salinity stress conditions. Data presented are means  $\pm$  SD. Different letters denote significant difference at  $p < 0.05$  based on the least significant difference (LSD) test. Abbreviation; CK=control, S1=NaCL 50 mM; S2=NaCL 100 mM; S3=NaCL 150 mM.

| Cultivars | Variables | Treatments          |                    |                    |                    |                     |                    |
|-----------|-----------|---------------------|--------------------|--------------------|--------------------|---------------------|--------------------|
|           |           | Control VS S 1      |                    | Control VS S2      |                    | Control VS S3       |                    |
|           |           | CK                  | S1                 | CK                 | S2                 | CK                  | S3                 |
| PI567731  | GP        | 93.33 $\pm$ 5.66 a  | 73 $\pm$ 5.77 a    | 93.33 $\pm$ 5.66 a | 83.33 $\pm$ 3.33 a | 93.33 $\pm$ 5.66 a  | 56.67 $\pm$ 4.81 b |
|           | GRI       | 3.8333 $\pm$ 0.21 a | 3.31 $\pm$ 0.25 a  | 3.83 $\pm$ 0.21 a  | 3.25 $\pm$ 0.22 a  | 3.8333 $\pm$ 0.21 a | 2.82 $\pm$ 0.33 a  |
|           | GE        | 80.00 $\pm$ 2.77 a  | 70 $\pm$ 5.77 a    | 80.00 $\pm$ 2.77 a | 66.67 $\pm$ 6.22 a | 80.00 $\pm$ 2.77 a  | 46.67 $\pm$ 3.33 b |
| PI416937  | GP        | 96.67 $\pm$ 3.33 a  | 73.33 $\pm$ 6.67 a | 96.67 $\pm$ 3.33 a | 50.67 $\pm$ 3.33 b | 96.67 $\pm$ 3.33 a  | 46.67 $\pm$ 3.33 b |
|           | GRI       | 3.63 $\pm$ 0.29 a   | 3.40 $\pm$ 0.45 a  | 3.63 $\pm$ 0.29 a  | 2.92 $\pm$ 0.281 a | 3.63 $\pm$ 0.29 a   | 2.81 $\pm$ 0.33 a  |
|           | GE        | 80.00 $\pm$ 3.33 a  | 60.00 $\pm$ 2.72 a | 80.00 $\pm$ 3.33 a | 53.33 $\pm$ 3.33 a | 80.00 $\pm$ 3.33 a  | 43.33 $\pm$ 2.13 b |
| PI567690  | GP        | 90 $\pm$ 5.67 a     | 70 $\pm$ 5.77 a    | 90 $\pm$ 5.67 a    | 66.67 $\pm$ 3.33 a | 90 $\pm$ 5.67 a     | 50.44 $\pm$ 6.66 b |
|           | GRI       | 3.59 $\pm$ 0.33 a   | 3.04 $\pm$ 0.60 a  | 3.59 $\pm$ 3.33 a  | 2.68 $\pm$ 0.20 b  | 3.59 $\pm$ 3.33 a   | 2.17 $\pm$ 0.13 b  |
|           | GE        | 83.33 $\pm$ 5.77a   | 66.67 $\pm$ 6.67a  | 83.33 $\pm$ 5.77a  | 60.00 $\pm$ 2.81 a | 83.33 $\pm$ 5.77a   | 43.33 $\pm$ 2.33 b |
| PI408105A | GP        | 90 $\pm$ 3.33 a     | 63.33 $\pm$ 2.82 a | 90 $\pm$ 3.33 a    | 53.33 $\pm$ 3.33 a | 90 $\pm$ 3.33 a     | 36.63 $\pm$ 2.33 b |
|           | GRI       | 3.56 $\pm$ 0.34 a   | 2.46 $\pm$ 0.25 b  | 3.56 $\pm$ 0.34 a  | 1.75 $\pm$ 0.28 b  | 3.56 $\pm$ 0.34 a   | 1.49 $\pm$ 0.21 b  |
|           | GE        | 90 $\pm$ 5.77 a     | 60.00 $\pm$ 5.25 a | 90 $\pm$ 5.77 a    | 40.00 $\pm$ 2.28 b | 90 $\pm$ 5.77 a     | 36.67 $\pm$ 0.21 b |

**Table S4.** Plant height, Shoot fresh weight, Shoot dry weight, Root dry weight, and leaf relative water content (LRWC), Leaf chlorophyll pigments, carotenoid contents, and Anthocyanin contents, Fv/Fm, non-photochemical quenching (NPQ) and photochemical quenching (qp) of PI567731 soybean cultivars grown under drought and salinity stress conditions. Data presented are means  $\pm$  SD. Different letters denote significant difference at  $p < 0.05$  based on the least significant difference (LSD).

| Cultivar                                  | PI567731             |                      |                      |                      |                             |                     |
|-------------------------------------------|----------------------|----------------------|----------------------|----------------------|-----------------------------|---------------------|
|                                           | Treatments           |                      |                      |                      |                             |                     |
|                                           | Control VS Drought   |                      | Control VS Salinity  |                      | Control VS drought salinity |                     |
| Variables                                 | Control              | Drought              | Control              | salinity             | Control                     | drought + salinity  |
| plant height (cm plant-1)                 | 76.663 $\pm$ 0.95 a  | 51.410 $\pm$ 3.20 b  | 76.663 $\pm$ 0.95 a  | 45.840 $\pm$ 0.76 b  | 76.663 $\pm$ 0.95 a         | 33.93 $\pm$ 1.06 b  |
| Shoot fresh weight (mg g-1 FW)            | 19.603 $\pm$ 0.65 a  | 12.173 $\pm$ 0.37 b  | 19.603 $\pm$ 0.65 a  | 9.743 $\pm$ 0.36 b   | 19.603 $\pm$ 0.65 a         | 6.800 $\pm$ 0.46 b  |
| Shoot dry weight (mg g-1 FW)              | 8.937 $\pm$ 0.30 a   | 7.840 $\pm$ 0.32 b   | 8.937 $\pm$ 0.30 a   | 7.037 $\pm$ 0.76 b   | 8.937 $\pm$ 0.30 a          | 3.270 $\pm$ 0.03 b  |
| Root dry weight (mg g-1 FW)               | 3.297 $\pm$ 0.40 a   | 2.217 $\pm$ 0.06 b   | 3.297 $\pm$ 0.40 a   | 1.55 $\pm$ 0.28 b    | 3.297 $\pm$ 0.40 a          | 1.043 $\pm$ 0.07 b  |
| LRWC (%)                                  | 81.376 $\pm$ 2.37 a  | 73.443 $\pm$ 2.55 b  | 81.376 $\pm$ 2.37 a  | 63.09 $\pm$ 2.62 b   | 81.376 $\pm$ 2.37 a         | 58.45 $\pm$ 1.56 b  |
| Chl a (mg g <sup>-1</sup> FW)             | 1.414 $\pm$ 0.67 a   | 0.816 $\pm$ 0.015 b  | 1.414 $\pm$ 0.67 a   | 0.774 $\pm$ 0.02 b   | 1.414 $\pm$ 0.67 a          | 0.449 $\pm$ 0.04 b  |
| Chl b (mg g <sup>-1</sup> FW)             | 5.278 $\pm$ 0.16 a   | 3.202 $\pm$ 0.18 b   | 5.278 $\pm$ 0.16 a   | 2.964 $\pm$ 0.2 b    | 5.278 $\pm$ 0.16 a          | 1.982 $\pm$ 0.19 b  |
| Total Chl (mg g <sup>-1</sup> FW)         | 6.692 $\pm$ 1.09 a   | 4.018 $\pm$ 1.21 b   | 6.692 $\pm$ 1.09 a   | 3.738 $\pm$ 0.72 b   | 6.692 $\pm$ 1.09 a          | 2.431 $\pm$ 0.12 b  |
| Carotenoid (mg g <sup>-1</sup> FW)        | 1.283 $\pm$ 0.16 a   | 0.476 $\pm$ 0.05 b   | 1.283 $\pm$ 0.16 a   | 0.475 $\pm$ 0.22 b   | 1.283 $\pm$ 0.16 a          | 0.451 $\pm$ 0.34 b  |
| Anthocyanin ( $\mu$ g g <sup>-1</sup> FW) | 71.490 $\pm$ 1.9 a   | 55.385 $\pm$ 4.46 b  | 71.49 $\pm$ 1.9 a    | 56.956 $\pm$ 1.87 b  | 71.49 $\pm$ 1.9 a           | 48.267 $\pm$ 3.24 b |
| FVFM                                      | 0.7736 $\pm$ 0.033 a | 0.6352 $\pm$ 0.023 b | 0.7736 $\pm$ 0.033 a | 0.3868 $\pm$ 0.033 b | 0.7736 $\pm$ 0.033 a        | 0.3739 $\pm$ 0.024b |
| qp                                        | 0.7852 $\pm$ 0.0263a | 0.6305 $\pm$ 0.0375a | 0.785 $\pm$ 0.0263a  | 0.4482 $\pm$ 0.0188b | 0.785 $\pm$ 0.0263a         | 0.3653 $\pm$ 0.02 b |
| NPQ                                       | 0.334 $\pm$ 0.013b   | 0.4253 $\pm$ 0.017a  | 0.334 $\pm$ 0.013 b  | 0.6367 $\pm$ 0.0195a | 0.334 $\pm$ 0.013b          | 0.7033 $\pm$ 0.039a |

**Table S5.** Plant height, Shoot fresh weight, Shoot dry weight, Root dry weight, and leaf relative water content (LRWC), Leaf chlorophyll pigments, carotenoid contents, and Anthocyanin contents, Fv/Fm, non-photochemical quenching (NPQ) and photochemical quenching (qp) of PI416937 soybean cultivars grown under drought and salinity stress conditions. Data presented are means  $\pm$  SD. Different letters denote significant difference at  $p < 0.05$  based on the least significant difference (LSD).

| Cultivars                                  | PI416937             |                       |                       |                       |                             |                       |
|--------------------------------------------|----------------------|-----------------------|-----------------------|-----------------------|-----------------------------|-----------------------|
| Variables                                  | Treatments           |                       |                       |                       |                             |                       |
|                                            | Control VS Drought   |                       | Control VS Salinity   |                       | Control VS drought salinity |                       |
|                                            | Control              | Drought               | CK                    | salinity              | CK                          | drought + salinity    |
| plant height (cm plant-1)                  | 69.233 $\pm$ 1.12 a  | 39.43 $\pm$ 1.06 b    | 69.233 $\pm$ 1.12 a   | 36.267 $\pm$ 1.20 b   | 69.233 $\pm$ 1.12 a         | 20.367 $\pm$ 0.03 b   |
| Shoot fresh weight (mg g <sup>-1</sup> FW) | 18.100 $\pm$ 0.22 a  | 7.927 $\pm$ 0.30 b    | 18.100 $\pm$ 0.22 a   | 6.7733 $\pm$ 0.38 b   | 18.100 $\pm$ 0.22 a         | 4.680 $\pm$ 0.20 b    |
| Shoot dry weight (mg g <sup>-1</sup> FW)   | 8.833 $\pm$ 0.22 a   | 4.143 $\pm$ 0.64 b    | 8.833 $\pm$ 0.22 a    | 4.410 $\pm$ 0.46 b    | 8.833 $\pm$ 0.22 a          | 2.263 $\pm$ 0.26 b    |
| Root dry weight (mg g <sup>-1</sup> FW)    | 3.100 $\pm$ 0.11 a   | 1.190 $\pm$ 0.14 b    | 3.100 $\pm$ 0.11 a    | 1.243 $\pm$ 0.12 b    | 3.100 $\pm$ 0.11 a          | 0.497 $\pm$ 0.26 b    |
| LRWC (%)                                   | 83.92 $\pm$ 3.21 a   | 50.51 $\pm$ 1.27 b    | 83.92 $\pm$ 3.21 a    | 60.79 $\pm$ 1.35 b    | 83.92 $\pm$ 3.21 a          | 48.47 $\pm$ 2.09 b    |
| Chl a (mg g <sup>-1</sup> FW)              | 1.388 $\pm$ 0.88 a   | 0.625 $\pm$ 0.03 b    | 1.388 $\pm$ 0.88 a    | 0.475 $\pm$ 0.01 b    | 1.388 $\pm$ 0.88 a          | 0.231 $\pm$ 0.07 b    |
| Chl b (mg g <sup>-1</sup> FW)              | 5.149 $\pm$ 0.10 a   | 2.380 $\pm$ 0.09 b    | 5.149 $\pm$ 0.10 a    | 2.231 $\pm$ 0.36 b    | 5.149 $\pm$ 0.10 a          | 1.728 $\pm$ 0.17 b    |
| Total Chl (mg g <sup>-1</sup> FW)          | 6.537 $\pm$ 0.43 a   | 3.005 $\pm$ 0.64 b    | 6.537 $\pm$ 0.43 a    | 2.706 $\pm$ 0.57 b    | 6.537 $\pm$ 0.43 a          | 1.959 $\pm$ 0.54 b    |
| Carotenoid (mg g <sup>-1</sup> FW)         | 0.944 $\pm$ 0.27 a   | 0.2887 $\pm$ 0.18 ab  | 0.944 $\pm$ 0.27 a    | 0.256 $\pm$ 0.45 b    | 0.944 $\pm$ 0.27 a          | 0.174 $\pm$ 0.33 b    |
| Anthocyanin ( $\mu$ g g <sup>-1</sup> FW)  | 76.596 $\pm$ 1.12 a  | 57.676 $\pm$ 1.33 b   | 76.596 $\pm$ 1.12 a   | 42.815 $\pm$ 4.48 b   | 76.596 $\pm$ 1.12 a         | 32.144 $\pm$ 4.67 b   |
| FVFM                                       | 0.7232 $\pm$ 0.012 a | 0.4577 $\pm$ 0.0312 a | 0.7232 $\pm$ 0.012 a  | 0.236 $\pm$ 0.016 b   | 0.7232 $\pm$ 0.013 a        | 0.3739 $\pm$ 0.012 b  |
| qp                                         | 0.7852 $\pm$ 0.0389  | 0.5011 $\pm$ 0.0223 a | 0.7852 $\pm$ 0.0389   | 0.4367 $\pm$ 0.010 b  | 0.7852 $\pm$ 0.0389         | 0.1934 $\pm$ 0.021 b  |
| NPQ                                        | 0.3133 $\pm$ 0.017 b | 0.4783 $\pm$ 0.0137 a | 0.3133 $\pm$ 0.0176 b | 0.7447 $\pm$ 0.0131 a | 0.3133 $\pm$ 0.0176 b       | 0.8107 $\pm$ 0.0275 a |

**Table S6.** Plant height, Shoot fresh weight, Shoot dry weight, Root dry weight, and leaf relative water content (LRWC), Leaf chlorophyll pigments, carotenoid contents, and Anthocyanin contents, Fv/Fm, non-photochemical quenching (NPQ) and photochemical quenching (qP) of PI567690 soybean cultivars grown under drought and salinity stress conditions. Data presented are means  $\pm$  SD. Different letters denote significant difference at  $p < 0.05$  based on the least significant difference (LSD).

| Cultivars                                 | PI567690             |                       |                      |                       |                             |                      |
|-------------------------------------------|----------------------|-----------------------|----------------------|-----------------------|-----------------------------|----------------------|
| Variables                                 | Treatments           |                       |                      |                       |                             |                      |
|                                           | Control VS Drought   |                       | Control VS Salinity  |                       | Control VS drought salinity |                      |
|                                           | Control              | Drought               | CK                   | salinity              | CK                          | drought + salinity   |
| Plant height (cm plant-1)                 | 66.567 $\pm$ 2.27 a  | 43.91 $\pm$ 1.02 b    | 66.567 $\pm$ 2.27 a  | 40.85 $\pm$ 2.40 b    | 66.567 $\pm$ 2.27 a         | 27.68 $\pm$ 0.76 b   |
| Shoot fresh weight (mg g-1 FW)            | 18.233 $\pm$ 0.32 a  | 10.300 $\pm$ 0.34 b   | 18.233 $\pm$ 0.32 a  | 8.933 $\pm$ 0.40 b    | 18.233 $\pm$ 0.32 a         | 5.657 $\pm$ 0.18 b   |
| Shoot dry weight (mg g-1 FW)              | 9.433 $\pm$ 0.65 a   | 7.633 $\pm$ 0.55 a    | 9.433 $\pm$ 0.65 a   | 5.27 $\pm$ 0.17 b     | 9.433 $\pm$ 0.65 a          | 2.867 $\pm$ 0.18 b   |
| Root dry weight (mg g-1 FW)               | 3.20 $\pm$ 0.07 a    | 1.280 $\pm$ 0.55 b    | 3.20 $\pm$ 0.07 a    | 0.920 $\pm$ 0.18 b    | 3.20 $\pm$ 0.07 a           | 0.727 $\pm$ 0.18 b   |
| LRWC (%)                                  | 83.119 $\pm$ 2.57 a  | 70.96 $\pm$ 1.89 a`   | 83.119 $\pm$ 2.57 a  | 65.831 $\pm$ 1.57 b`  | 83.119 $\pm$ 2.57 a         | 55.514 $\pm$ 2.81 b` |
| Chl a (mg g <sup>-1</sup> FW)             | 1.437 $\pm$ 0.44 a   | 0.316 $\pm$ 0.06 b    | 1.437 $\pm$ 0.44 a   | 0.251 $\pm$ 0.08 b    | 1.437 $\pm$ 0.44 a          | 0.114 $\pm$ 0.03 b   |
| Chl b (mg g <sup>-1</sup> FW)             | 4.994 $\pm$ 0.14 a   | 2.771 $\pm$ 0.28 b    | 4.994 $\pm$ 0.14 a   | 2.883 $\pm$ 0.19 b    | 4.994 $\pm$ 0.14 a          | 1.922 $\pm$ 0.11 b   |
| Total Chl (mg g <sup>-1</sup> FW)         | 6.431 $\pm$ 1.13 a   | 3.087 $\pm$ 0.74 b    | 6.431 $\pm$ 1.13 a   | 3.134 $\pm$ 0.22 b    | 6.431 $\pm$ 1.13 a          | 2.063 $\pm$ 0.29 b   |
| Carotenoid (mg g <sup>-1</sup> FW)        | 1.0172 $\pm$ 1.11a   | 0.337 $\pm$ 0.55 b    | 1.0172 $\pm$ 1.11a   | 0.423 $\pm$ 0.13 b    | 1.017 $\pm$ 1.11a           | 0.272 $\pm$ 0.65 b   |
| Anthocyanin ( $\mu$ g g <sup>-1</sup> FW) | 78.691 $\pm$ 2.85 a  | 52.544 $\pm$ 0.79 b   | 78.691 $\pm$ 2.85 a  | 51.784 $\pm$ 2.74 b   | 78.691 $\pm$ 2.85 a         | 42.750 $\pm$ 3.53 b  |
| FVFM                                      | 0.7631 $\pm$ 0.045 a | 0.5465 $\pm$ 0.0214 a | 0.7631 $\pm$ 0.045 a | 0.3308 $\pm$ 0.0382 b | 0.7631 $\pm$ 0.045 a        | 0.2004 $\pm$ 0.016 b |
| qp                                        | 0.7588 $\pm$ 0.043a  | 0.505 $\pm$ 0.0246a   | 0.7588 $\pm$ 0.043a  | 0.3554 $\pm$ 0.0306b  | 0.7588 $\pm$ 0.043a         | 0.1637 $\pm$ 0.0336b |
| NPQ                                       | 0.2627 $\pm$ 0.029 a | 0.5647 $\pm$ 0.0124 b | 0.2627 $\pm$ 0.029 b | 0.5043 $\pm$ 0.022 a  | 0.2627 $\pm$ 0.029 b        | 0.8243 $\pm$ 0.032 a |

**Table S7.** Plant height, Shoot fresh weight, Shoot dry weight, Root dry weight, and leaf relative water content (LRWC), Leaf chlorophyll pigments, carotenoid contents, and Anthocyanin contents, Fv/Fm, non-photochemical quenching (NPQ) and photochemical quenching (qP) of PI408105A soybean cultivars grown under drought and salinity stress conditions. Data presented are means  $\pm$  SD. Different letters denote significant difference at  $p < 0.05$  based on the least significant difference (LSD).

| Cultivars                                 | PI408105A            |                       |                       |                      |                             |                       |
|-------------------------------------------|----------------------|-----------------------|-----------------------|----------------------|-----------------------------|-----------------------|
| Variables                                 | Treatments           |                       |                       |                      |                             |                       |
|                                           | Control VS Drought   |                       | Control VS Salinity   |                      | Control VS drought salinity |                       |
|                                           | Control              | Drought               | CK                    | salinity             | CK                          | drought + salinity    |
| plant height (cm plant-1)                 | 62.93 $\pm$ 2.90 a   | 22.03 $\pm$ 1.11 b    | 62.93 $\pm$ 2.90 a    | 25.43 $\pm$ 1.93 b   | 62.93 $\pm$ 2.90 a          | 17.33 $\pm$ 1.40 b    |
| Shoot fresh weight (mg g-1 FW)            | 16.74 $\pm$ 0.90 a   | 5.480 $\pm$ 0.30 b    | 16.74 $\pm$ 0.90 a    | 6.28 $\pm$ 0.23 b    | 16.74 $\pm$ 0.90 a          | 4.657 $\pm$ 0.23 b    |
| Shoot dry weight (mg g-1 FW)              | 8.267 $\pm$ 0.40 a   | 2.573 $\pm$ 0.33 b    | 8.267 $\pm$ 0.40 a    | 4.023 $\pm$ 0.86 b   | 8.267 $\pm$ 0.40 a          | 1.633 $\pm$ 0.22 b    |
| Root dry weight (mg g-1 FW)               | 2.897 $\pm$ 0.08 a   | 0.887 $\pm$ 0.03 b    | 2.897 $\pm$ 0.08 a    | 1.030 $\pm$ 0.08 b   | 2.897 $\pm$ 0.08 a          | 0.347 $\pm$ 0.22 b    |
| LRWC (%)                                  | 80.39 $\pm$ 4.44 a   | 61.78 $\pm$ 3.52 b`   | 80.39 $\pm$ 4.44 a    | 42.48 $\pm$ 2.45 b   | 80.39 $\pm$ 4.44 a          | 41.39 $\pm$ 1.53 b    |
| Chl a (mg g <sup>-1</sup> FW)             | 1.388 $\pm$ 0.055a   | 0.215 $\pm$ 0.03 b    | 1.388 $\pm$ 0.055a    | 0.233 $\pm$ 0.21b    | 1.388 $\pm$ 0.055a          | 0.158 $\pm$ 0.14 b    |
| Chl b (mg g <sup>-1</sup> FW)             | 4.902 $\pm$ 0.29 a   | 2.225 $\pm$ 0.15 b    | 4.902 $\pm$ 0.29 a    | 2.356 $\pm$ 0.17 b   | 4.902 $\pm$ 0.29 a          | 1.421 $\pm$ 0.12 b    |
| Total Chl (mg g <sup>-1</sup> FW)         | 6.29 $\pm$ 1.08 a    | 2.44 $\pm$ 0.98b      | 6.29 $\pm$ 1.08 a     | 2.589 $\pm$ 0.65b    | 6.29 $\pm$ 1.08 a           | 1.579 $\pm$ 0.54 b    |
| Carotenoid (mg g <sup>-1</sup> FW)        | 0.967 $\pm$ 0.88 a   | 0.181 $\pm$ 0.57 b    | 0.967 $\pm$ 0.88 a    | 0.254 $\pm$ 0.14 b   | 0.967 $\pm$ 0.88 a          | 0.1284 $\pm$ 0.44 b   |
| Anthocyanin ( $\mu$ g g <sup>-1</sup> FW) | 80.262 $\pm$ 6.17 a  | 46.94 $\pm$ 3.88 b    | 80.262 $\pm$ 6.17 a   | 50.082 $\pm$ 5.57 b  | 80.262 $\pm$ 6.17 a         | 30.311 $\pm$ 0.74 b   |
| FVFM                                      | 0.7794 $\pm$ 0.015 a | 0.2997 $\pm$ 0.0328 b | 0.7794 $\pm$ 0.0153 a | 0.3009 $\pm$ 0.039 b | 0.7794 $\pm$ 0.015 a        | 0.0922 $\pm$ 0.026 b  |
| Qp                                        | 0.7588 $\pm$ 0.021a  | 0.3404 $\pm$ 0.0513b  | 0.7588 $\pm$ 0.0211a  | 0.2442 $\pm$ 0.036 b | 0.7588 $\pm$ 0.021a         | 0.1179 $\pm$ 0.017 b  |
| NPQ                                       | 0.4167 $\pm$ 0.018 b | 0.6693 $\pm$ 0.0307 a | 0.4167 $\pm$ 0.0181 b | 0.6367 $\pm$ 0.012a  | 0.4167 $\pm$ 0.018 b        | 0.7703 $\pm$ 0.0181 a |

**Table S8.** Proline, Free Amino acids, Soluble Sugars, Protein, Total phenols, Total flavonoids, lipid peroxidation and Electrolyte leakage, Superoxide dismutase, Peroxidase, Catalase, and Ascorbate peroxidase of PI567731 soybean cultivars grown under drought and salinity stress conditions. Data presented are means  $\pm$  SD. Different letters denote significant difference at  $p < 0.05$  based on the least significant difference (LSD).

| Cultivars                                              | PI567731             |                      |                      |                      |                             |                     |
|--------------------------------------------------------|----------------------|----------------------|----------------------|----------------------|-----------------------------|---------------------|
| Variables                                              | Treatments           |                      |                      |                      |                             |                     |
|                                                        | Control VS Drought   |                      | Control VS Salinity  |                      | Control VS drought salinity |                     |
|                                                        | Control              | Drought              | CK                   | salinity             | CK                          | drought + salinity  |
| Proline content (mg g <sup>-1</sup> FW)                | 16.465 $\pm$ 0.60 b  | 78.975 $\pm$ 1.001a  | 16.465 $\pm$ 0.60b   | 66.892 $\pm$ 1.227a  | 16.465 $\pm$ 0.60b          | 82.14 $\pm$ 1.203a  |
| Soluble Sugar (mg g <sup>-1</sup> FW)                  | 4.644 $\pm$ 0.1438 b | 8.929 $\pm$ 0.407a   | 4.644 $\pm$ 0.143b   | 9.3769 $\pm$ 0.244a  | 4.644 $\pm$ 0.144b          | 10.77 $\pm$ 0.504a  |
| Amino acid content (mg g <sup>-1</sup> FW)             | 5.143 $\pm$ 0.143 b  | 10.458 $\pm$ 0.4074a | 5.143 $\pm$ 0.143b   | 10.48 $\pm$ 0.244a   | 5.143 $\pm$ 0.143b          | 14.11 $\pm$ 0.704a  |
| Protein (mg <sup>-1</sup> DM)                          | 9.933 $\pm$ 0.359 a  | 6.713 $\pm$ 0.3702b  | 9.933 $\pm$ 0.359a   | 4.857 $\pm$ 0.379b   | 9.933 $\pm$ 0.359a          | 4.887 $\pm$ 0.391b  |
| Total phenol (mg g <sup>-1</sup> DW)                   | 3.698 $\pm$ 0.479 b  | 8.526 $\pm$ 0.466a   | 3.698 $\pm$ 0.479b   | 9.453 $\pm$ 0.439a   | 3.6978 $\pm$ 0.479b         | 12.59 $\pm$ 0.518a  |
| Total flavonoids (mg g <sup>-1</sup> DW)               | 3.476 $\pm$ 0.509 b  | 10.94 $\pm$ 0.5261a  | 3.476 $\pm$ 0.509b   | 10.989 $\pm$ 0.418a  | 3.4762 $\pm$ 0.509b         | 15.55 $\pm$ 0.7341a |
| MDA (mmol g <sup>-1</sup> FW)                          | 0.110 $\pm$ 0.0293a  | 0.269 $\pm$ 0.0137a  | 0.110 $\pm$ 0.0293a  | 0.3245 $\pm$ 0.013a  | 0.1105 $\pm$ 0.0293b        | 0.5626 $\pm$ 0.015a |
| Electrolytic leakage                                   | 9.888 $\pm$ 2.202 a  | 14.34 $\pm$ 1.9798a  | 9.888 $\pm$ 2.20a    | 13.284 $\pm$ 1.192a  | 9.888 $\pm$ 2.202a          | 28.983 $\pm$ 2.842a |
| SOD activity (U g <sup>-1</sup> min <sup>-1</sup> )    | 44.66 $\pm$ 4.515 b  | 87.28 $\pm$ 5.0092a  | 44.66 $\pm$ 4.515b   | 75.403 $\pm$ 2.606a  | 44.66 $\pm$ 4.515b          | 112.98 $\pm$ 3.767a |
| POD activity (U g <sup>-1</sup> FW min <sup>-1</sup> ) | 187.05 $\pm$ 8.35 b  | 404.24 $\pm$ 9.1401a | 187.05 $\pm$ 8.345b  | 331.44 $\pm$ 9.7912a | 187.05 $\pm$ 8.345b         | 543.69 $\pm$ 6.767a |
| CAT activity (U g <sup>-1</sup> FW min <sup>-1</sup> ) | 26.11 $\pm$ 3.96 b   | 57.175 $\pm$ 1.0941a | 26.11 $\pm$ 3.958b   | 64.228 $\pm$ 3.7305a | 26.11 $\pm$ 3.958b          | 76.40 $\pm$ 2.26a   |
| APX activity (U g <sup>-1</sup> FW min <sup>-1</sup> ) | 64.298 $\pm$ 4.436 b | 122.45 $\pm$ 5.4194a | 64.298 $\pm$ 4.4365b | 105 $\pm$ 0.7243a    | 64.298 $\pm$ 4.4365b        | 165.58 $\pm$ 4.777a |

**Table S9.** Proline, Free Amino acids, Soluble Sugars, Protein, Total phenols, Total flavonoids, lipid peroxidation and Electrolyte leakage, Superoxide dismutase, Peroxidase, Catalase, and Ascorbate peroxidase of PI416937 soybean cultivars grown under drought and salinity stress conditions. Data presented are means  $\pm$  SD. Different letters denote significant difference at  $p < 0.05$  based on the least significant difference (LSD).

| Cultivars                                              | PI416937            |                      |                     |                      |                             |                      |
|--------------------------------------------------------|---------------------|----------------------|---------------------|----------------------|-----------------------------|----------------------|
| Variables                                              | Treatments          |                      |                     |                      |                             |                      |
|                                                        | Control VS Drought  |                      | Control VS Salinity |                      | Control VS drought salinity |                      |
|                                                        | Control             | Drought              | CK                  | salinity             | CK                          | drought + salinity   |
| Proline content (mg g <sup>-1</sup> FW)                | 20.81 $\pm$ 1.044b  | 63.892 $\pm$ 2.255a  | 20.81 $\pm$ 1.0441b | 60.058 $\pm$ 2.4847a | 20.808 $\pm$ 1.044b         | 66.392 $\pm$ 0.667a  |
| Soluble Sugar (mg g <sup>-1</sup> FW)                  | 4.653 $\pm$ 0.533b  | 8.105 $\pm$ 0.267a   | 4.653 $\pm$ 0.533b  | 6.625 $\pm$ 0.6064a  | 4.653 $\pm$ 0.533b          | 10.154 $\pm$ 0.474a  |
| Amino acid content (mg g <sup>-1</sup> FW)             | 4.892 $\pm$ 0.533b  | 8.083 $\pm$ 0.267a   | 4.892 $\pm$ 0.533a  | 7.049 $\pm$ 0.6064a  | 4.892 $\pm$ 0.533a          | 10.269 $\pm$ 0.774a  |
| Protein (mg <sup>-1</sup> DM)                          | 8.597 $\pm$ 0.392a  | 5.339 $\pm$ 0.193a   | 8.597 $\pm$ 0.392a  | 2.4409 $\pm$ 0.321b  | 8.597 $\pm$ 0.392a          | 3.4314 $\pm$ 0.28a   |
| Total phenol (mg g <sup>-1</sup> DW)                   | 4.0367 $\pm$ 0.494b | 8.693 $\pm$ 0.423a   | 4.0367 $\pm$ 0.494b | 6.86 $\pm$ 0.3043a   | 4.0367 $\pm$ 0.494b         | 12.577 $\pm$ 0.370a  |
| Total flavonoids (mg g <sup>-1</sup> DW)               | 3.218 $\pm$ 0.139b  | 10.665 $\pm$ 0.679a  | 3.218 $\pm$ 0.139b  | 8.414 $\pm$ 0.3142a  | 3.218 $\pm$ 0.139b          | 13.542 $\pm$ 0.728a  |
| MDA (mmol g <sup>-1</sup> FW)                          | 0.182 $\pm$ 0.013b  | 0.268 $\pm$ 0.0234a  | 0.182 $\pm$ 0.0134b | 0.5763 $\pm$ 0.0378a | 0.1816 $\pm$ 0.013b         | 0.6911 $\pm$ 0.010a  |
| Electrolytic leakage                                   | 11.23 $\pm$ 1.136a  | 16.121 $\pm$ 3.0643a | 11.223 $\pm$ 1.136b | 22.87 $\pm$ 2.1353a  | 11.226 $\pm$ 1.136a         | 30.743 $\pm$ 2.296a  |
| SOD activity (U g <sup>-1</sup> min <sup>-1</sup> )    | 47.5 $\pm$ 1.825b   | 80.283 $\pm$ 1.71a   | 47.5 $\pm$ 1.825b   | 69.01 $\pm$ 3.2029a  | 47.5 $\pm$ 1.825b           | 90.19 $\pm$ 3.664a   |
| POD activity (U g <sup>-1</sup> FW min <sup>-1</sup> ) | 168.39 $\pm$ 6.120b | 353.89 $\pm$ 7.522a  | 168.39 $\pm$ 6.120b | 258.64 $\pm$ 5.7965a | 168.39 $\pm$ 6.120b         | 502.14 $\pm$ 11.541a |
| CAT activity (U g <sup>-1</sup> FW min <sup>-1</sup> ) | 22.38 $\pm$ 1.326b  | 52.293 $\pm$ 4.396a  | 22.38 $\pm$ 1.326b  | 52.171 $\pm$ 4.1543a | 22.379 $\pm$ 1.326b         | 68.502 $\pm$ 2.715a  |
| APX activity (U g <sup>-1</sup> FW min <sup>-1</sup> ) | 48.55 $\pm$ 5.328b  | 103.87 $\pm$ 3.921a  | 48.55 $\pm$ 5.328b  | 77.33 $\pm$ 3.124a   | 48.547 $\pm$ 5.328b         | 145.04 $\pm$ 4.792a  |



**Table S10.** Proline, Free Amino acids, Soluble Sugars, Protein, Total phenols, Total flavonoids, lipid peroxidation and Electrolyte leakage, Superoxide dismutase, Peroxidase, Catalase, and Ascorbate peroxidase of PI567690 soybean cultivars grown under drought and salinity stress conditions. Data presented are means  $\pm$  SD. Different letters denote significant difference at  $p < 0.05$  based on the least significant difference (LSD).

| Cultivars                                              | PI567690            |                     |                     |                     |                             |                     |
|--------------------------------------------------------|---------------------|---------------------|---------------------|---------------------|-----------------------------|---------------------|
| Variables                                              | Treatments          |                     |                     |                     |                             |                     |
|                                                        | Control VS Drought  |                     | Control VS Salinity |                     | Control VS drought salinity |                     |
|                                                        | Control             | Drought             | CK                  | salinity            | CK                          | drought + salinity  |
| Proline content (mg g <sup>-1</sup> FW)                | 21.242 $\pm$ 3.34b  | 73.892 $\pm$ 2.086a | 21.242 $\pm$ 3.34b  | 54.558 $\pm$ 2.504a | 21.242 $\pm$ 3.339b         | 75.308 $\pm$ 3.812a |
| Soluble Sugar (mg g <sup>-1</sup> FW)                  | 4.2436 $\pm$ 0.345b | 9.429 $\pm$ 0.244a  | 4.2436 $\pm$ 0.345b | 8.2464 $\pm$ 0.505a | 4.2436 $\pm$ 0.345b         | 8.542 $\pm$ 0.308a  |
| Amino acid content (mg g <sup>-1</sup> FW)             | 5.5676 $\pm$ 0.345a | 8.838 $\pm$ 0.244a  | 5.5676 $\pm$ 0.345a | 7.753 $\pm$ 0.505a  | 5.5676 $\pm$ 0.345b         | 11.841 $\pm$ 0.308a |
| Protein (mg <sup>-1</sup> DM)                          | 10.335 $\pm$ 0.599a | 4.8546 $\pm$ 0.046b | 10.335 $\pm$ 0.599a | 4.400 $\pm$ 0.389a  | 10.335 $\pm$ 0.599a         | 3.1359 $\pm$ 0.317b |
| Total phenol (mg g <sup>-1</sup> DW)                   | 3.6053 $\pm$ 0.372a | 8.8356 $\pm$ 0.519b | 3.6053 $\pm$ 0.372a | 7.8338 $\pm$ 0.380a | 3.6053 $\pm$ 0.372a         | 11.433 $\pm$ 0.218b |
| Total flavonoids (mg g <sup>-1</sup> DW)               | 4.4484 $\pm$ 0.465b | 10.983 $\pm$ 0.649a | 4.4484 $\pm$ 0.465a | 9.733 $\pm$ 0.248a  | 4.4484 $\pm$ 0.465b         | 14.23 $\pm$ 0.522a  |
| MDA (mmol g <sup>-1</sup> FW)                          | 0.1108 $\pm$ 0.038b | 0.319 $\pm$ 0.035a  | 0.1108 $\pm$ 0.038b | 0.4315 $\pm$ 0.016a | 0.1108 $\pm$ 0.038b         | 0.6424 $\pm$ 0.018a |
| Electrolytic leakage                                   | 9.33 $\pm$ 1.925a   | 16.066 $\pm$ 0.595a | 9.33 $\pm$ 1.925a   | 14.099 $\pm$ 1.009a | 9.33 $\pm$ 1.925b           | 32.686 $\pm$ 1.378a |
| SOD activity (U g <sup>-1</sup> min <sup>-1</sup> )    | 50.107 $\pm$ 5.065a | 80.047 $\pm$ 2.379a | 50.107 $\pm$ 5.065b | 70.837 $\pm$ 2.436a | 50.107 $\pm$ 5.065b         | 98.92 $\pm$ 1.513a  |
| POD activity (U g <sup>-1</sup> FW min <sup>-1</sup> ) | 198.64 $\pm$ 7.257b | 372.07 $\pm$ 5.738a | 198.64 $\pm$ 7.257b | 269.23 $\pm$ 6.424a | 198.64 $\pm$ 7.257b         | 518.1 $\pm$ 4.454a  |
| CAT activity (U g <sup>-1</sup> FW min <sup>-1</sup> ) | 28.696 $\pm$ 3.790b | 50.481 $\pm$ 2.373a | 28.696 $\pm$ 3.790b | 44.309 $\pm$ 3.505a | 28.696 $\pm$ 3.790a         | 63.537 $\pm$ 4.98a  |
| APX activity (U g <sup>-1</sup> FW min <sup>-1</sup> ) | 47.454 $\pm$ 3.624a | 97.13 $\pm$ 8.702a  | 47.454 $\pm$ 3.625b | 87.77 $\pm$ 0.757a  | 47.454 $\pm$ 3.624b         | 142.58 $\pm$ 3.683a |

**Table S11.** Proline, Free Amino acids, Soluble Sugars, Protein, Total phenols, Total flavonoids, lipid peroxidation and Electrolyte leakage, Superoxide dismutase, Peroxidase, Catalase, and Ascorbate peroxidase of PI408105A soybean cultivars grown under drought and salinity stress conditions. Data presented are means  $\pm$  SD. Different letters denote significant difference at  $p < 0.05$  based on the least significant difference (LSD).

| Cultivars                                              | PI408105A           |                      |                      |                             |                     |                      |
|--------------------------------------------------------|---------------------|----------------------|----------------------|-----------------------------|---------------------|----------------------|
| Variables                                              | Treatments          |                      |                      |                             |                     |                      |
|                                                        | Control VS Drought  | Control VS Salinity  |                      | Control VS drought salinity |                     |                      |
|                                                        | Control             | Drought              | CK                   | salinity                    | CK                  | drought + salinity   |
| Proline content (mg g <sup>-1</sup> FW)                | 22.642 $\pm$ 0.542a | 30.725 $\pm$ 1.607a  | 22.642 $\pm$ 0.542a  | 35.642 $\pm$ 1.333b         | 22.642 $\pm$ 0.542a | 51.725 $\pm$ 2.6827b |
| Soluble Sugar (mg g <sup>-1</sup> FW)                  | 4.9075 $\pm$ 0.055b | 7.0857 $\pm$ 0.339a  | 4.9075 $\pm$ 0.055b  | 7.4806 $\pm$ 0.397a         | 4.9075 $\pm$ 0.055b | 8.153 $\pm$ 0.3083a  |
| Amino acid content (mg g <sup>-1</sup> FW)             | 5.064 $\pm$ 0.338b  | 8.9953 $\pm$ 0.055a  | 5.064 $\pm$ 0.338b   | 8.697 $\pm$ 0.398a          | 5.064 $\pm$ 0.338a  | 8.011 $\pm$ 0.2083a  |
| Protein (mg <sup>-1</sup> DM)                          | 7.379 $\pm$ 0.121a  | 4.4835 $\pm$ 0.565a  | 7.379 $\pm$ 0.121a   | 5.4645 $\pm$ 0.561a         | 7.379 $\pm$ 0.121a  | 1.5946 $\pm$ 0.1509b |
| Total phenol (mg g <sup>-1</sup> DW)                   | 3.5433 $\pm$ 0.434b | 6.5587 $\pm$ 0.408a  | 3.5433 $\pm$ 0.434b  | 8.2571 $\pm$ 0.455a         | 3.5433 $\pm$ 0.434b | 9.421 $\pm$ 0.3251a  |
| Total flavonoids (mg g <sup>-1</sup> DW)               | 4.369 $\pm$ 0.542b  | 8.139 $\pm$ 0.585a   | 4.369 $\pm$ 0.542b   | 10.262 $\pm$ 0.569a         | 4.369 $\pm$ 0.542b  | 11.717 $\pm$ 0.4063a |
| MDA (mmol g <sup>-1</sup> FW)                          | 0.203 $\pm$ 0.021b  | 0.574 $\pm$ 0.055a   | 0.2029 $\pm$ 0.021b  | 0.6648 $\pm$ 0.018a         | 0.2029 $\pm$ 0.021b | 0.8705 $\pm$ 0.0234a |
| Electrolytic leakage                                   | 11.268 $\pm$ 0.785a | 25.754 $\pm$ 0.801a  | 11.268 $\pm$ 0.785a  | 18.008 $\pm$ 0.686a         | 11.268 $\pm$ 0.785b | 42.127 $\pm$ 0.8011a |
| SOD activity (U g <sup>-1</sup> min <sup>-1</sup> )    | 40.297 $\pm$ 2.120a | 65.137 $\pm$ 3.276a  | 40.297 $\pm$ 2.120a  | 67.467 $\pm$ 1.568a         | 40.297 $\pm$ 2.120b | 83.99 $\pm$ 2.8378a  |
| POD activity (U g <sup>-1</sup> FW min <sup>-1</sup> ) | 232.04 $\pm$ 6.53b  | 316 $\pm$ 7.319a     | 232.04 $\pm$ 6.526b  | 335.34 $\pm$ 4.3712a        | 232.04 $\pm$ 6.526b | 512.72 $\pm$ 6.8382a |
| CAT activity (U g <sup>-1</sup> FW min <sup>-1</sup> ) | 22.897 $\pm$ 4.834b | 48.4147 $\pm$ 4.013a | 22.897 $\pm$ 4.8339a | 52.1709 $\pm$ 2.6146a       | 22.897 $\pm$ 4.834b | 56.674 $\pm$ 3.9635a |
| APX activity (U g <sup>-1</sup> FW min <sup>-1</sup> ) | 51.441 $\pm$ 2.718b | 79.73 $\pm$ 5.287a   | 51.441 $\pm$ 2.718b  | 93.34 $\pm$ 2.4876a         | 51.441 $\pm$ 2.718b | 149.72 $\pm$ 7.2735a |
